# Supplementary material for: The Anti-Fibrotic Effects of CG-745, an HDAC Inhibitor, in Bleomycin and PHMG-Induced Mouse Models
Source: MDPI journal article supplement (doi:10.3390/molecules24152792), 2019-07-31
Supplement: s1 [file s1]

## Supplementary materials

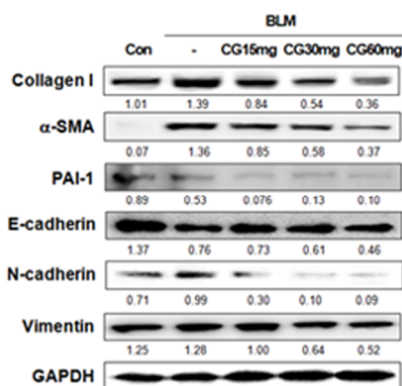

**Supplementary Figure S1.** CG-745 ameliorates pulmonary fibrosis induced by bleomycin in mice. Mice were instilled with bleomycin (2 mg/kg) intratracheally on day 0, and CG-745 (15, 30 or 60 mg/kg) was intraperitoneally administered daily for 14 days. The protein levels of fibrotic marker (collagen I, α-SMA, PAI-1) and EMT marker (E-cadherin, N-cadherin, vimentin) in the lung tissues were analyzed by western blotting.

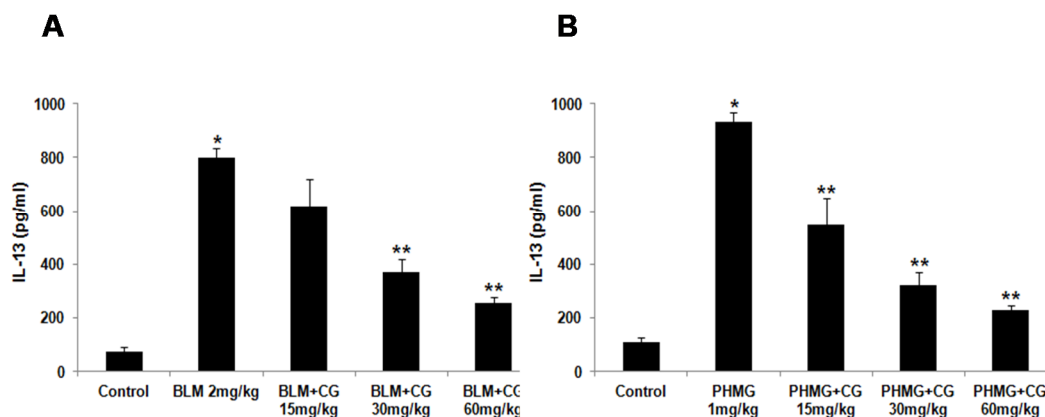

**Supplementary Figure S2.** CG-745 ameliorates pulmonary inflammation. The levels of IL-13 in the BALF were analyzed by ELISA. Data are presented as mean ± SD, n=5. \*  $p < 0.01$  vs. control group. \*\*  $p < 0.05$  vs. (A) bleomycin group or (B) PHMG group.
